# Supplementary material
Source: HighWire-hosted journal article supplement (https://thorax.bmj.com/content/74/2/157)
Supplement: inline-supplementary-material-1 [file inline-supplementary-material-1.pdf]

## **Supplementary File 1**

### **MEDLINE (Pubmed) search strategy**

1. Blood Gas Monitoring, Transcutaneous [MeSH]
2. (TOSCA ADJ5 TCM) OR (Sentec ADJ5 V-Sign) OR (Transend ADJ5 SensorMedics) OR (FasTrac ADJ5 Critikon)
3. 1 OR 2
4. Preoperative OR pre-operative OR peri-operative OR perioperative OR intra-operative OR intraoperative OR post-operative OR postoperative OR anesthesia OR anaesthesia OR anesthesiology OR anaesthesiology
5. Surgery OR surgical OR operation OR operative OR operating
6. Critical care OR intensive care OR ICU OR Emergency department
7. Respiratory Failure (exp)
8. 4 OR 5 OR 6 OR 7
9. Accuracy OR precision OR reliability OR validity OR validation OR standard deviation
10. Bias OR mean difference OR limit of agreement OR Bland Altman
11. 9 OR 10
12. (exp "diagnostic errors"/ OR exp "sensitivity and specificity"/ OR (accura\* OR reliabilit\* OR target\* OR utilit\* OR discriminat\* OR differentiat\*))
13. 11 OR 12
14. 3 AND 8 AND 13
15. 14 AND NOT (animals [mh] NOT humans [mh])

### **EMBASE search strategy**

1. transcutaneous carbon dioxide monitoring

2. (TOSCA ADJ5 TCM) OR (Sentec ADJ5 V-Sign) OR (Transend ADJ5 SensorMedics) OR (FasTrac ADJ5 Critikon)
3. 1 OR 2
4. Preoperative OR pre-operative OR peri-operative OR perioperative OR intra-operative OR intraoperative OR post-operative OR postoperative OR anesthesia OR anaesthesia OR anesthesiology OR anaesthesiology
5. Surgery OR surgical OR operation OR operative OR operating
6. Critical care OR intensive care OR ICU OR Emergency department
7. Hypercapnia OR hypercapnea OR hypercarbia OR Respiratory Failure (exp)
8. 4 OR 5 OR 6 OR 7
9. Accuracy OR precision OR reliability OR validity OR validation OR standard deviation
10. Bias OR mean difference OR limit of agreement OR Bland Altman
11. 9 OR 10
12. ('diagnostic accuracy'/de OR 'diagnostic test accuracy study'/de OR 'diagnostic error'/exp OR 'diagnostic value'/de OR 'sensitivity and specificity'/de OR 'predictive value'/de OR (accura\* OR reliabilit\* OR target\* OR utilit\* OR discriminat\* OR differentiat\*))
13. 11 OR 12
14. 3 AND 8 AND 13
15. 14 AND NOT (animals [mh] NOT humans [mh])

**Specific formulas from (1) used to calculate population limits of agreement (i.e. limits of agreement with outer 95% confidence intervals)**

Step 1: We adjusted repeated measurements, which were not properly adjusted in individual studies using the formula:

$$Sj^{2*} = Sj^2 / [(N_j - 1)/(N_j - C_j)],$$

where  $Sj^2$  is the within-study variance in differences between PaCO<sub>2</sub> and TcCO<sub>2</sub>,  $N_j$  is the total number of measurements taken and  $C_j$  is the number of measurements per individuals.

Step 2:

We calculated pooled limits of agreement:

$$\delta \pm 2\sqrt{(\sigma^2 + \tau^2)},$$

where  $\delta$  is the average bias across studies (mean difference between PaCO<sub>2</sub> and TcCO<sub>2</sub>),  $\sigma^2$  is the average *adjusted* within-study variation in differences (the average of the  $Sj^{2*}$  from the previous formula) between PaCO<sub>2</sub> and TcCO<sub>2</sub>, and  $\tau^2$  is the variation in bias across studies.

The parameters  $\delta$  and  $\sigma^2$  were estimated using weighted least squares (with approximately inverse variance weights) and their standard errors were estimated using robust variance estimation (RVE). We used RVE instead of model-based standard errors since most studies included multiple measurements from each individual and the exact correlation between these measurements was unknown. The method-of-moments estimator (2) was used for the  $\tau^2$  parameter.

Step 3:

We calculated outer 95% confidence intervals for pooled limits of agreement using the formulas:

$$CI-LOA_{L \text{ or } U} = LOA_{L \text{ or } U} \pm t(m-1, 0.25) * \sqrt{Var(LOA)},$$

where  $t(m-1, .025)$  is the critical value for the t-distribution with  $m-1$  degrees of freedom. We estimated  $Var(LOA)$  from a formula included in (1) that is a combination of the sampling variances of the estimates of the mean bias, the mean precision, and the between study variation in bias.

### Study characteristics

| Study                      | n   | Participants and setting                                                         | PaCO <sub>2</sub> Mean (SD) or Median (IQR) | Technology                    | Location of sensor                  | Device temperature |
|----------------------------|-----|----------------------------------------------------------------------------------|---------------------------------------------|-------------------------------|-------------------------------------|--------------------|
| Aarrestad 2016 (3)         | 65  | Patients with chronic respiratory failure on long term non-invasive ventilation. | Mean 45.75 mmHg (SD 6.75)                   | TOSCA500 Sensor 92            | Ear lobe                            | 43°C               |
| Baulig 2007 (4)            | 18  | Adults after elective cardiac surgery.                                           | Median 5.43 kPa, range 3.61-7.41 kPa        | Sentec Vsign                  | Ear lobe                            | not reported       |
| Baulig 2015 (5)            | 50  | Patients undergoing elective, unilateral shoulder surgery.                       | Not reported                                | Sentec Vsign 2                | Ear lobe                            | not reported       |
| Bendjelid 2005 (6)         | 55  | Adult ICU                                                                        | Not reported                                | TOSCA                         | Ear lobe                            | 42°C               |
| Berkenbosch 2001 (7)       | 25  | Older children receiving mechanical ventilation                                  | Not reported                                | TOSCA TCM3                    | Not reported                        | 43.5°C             |
| Berkenbosch 2002 (8)       | 14  | Infants and children receiving high-frequency oscillatory ventilation            | Not reported                                | TOSCA TCM3                    | Not reported                        | 43.5°C             |
| Berlowitz 2011 (9)         | 6   | ICU patients with arterial line                                                  | Not reported                                | TOSCA TCM3                    | Chest                               | 43°C               |
| Bernet 2008 (10)           | 20  | NICU                                                                             | Median 5.8kPa, range 6.4-10.6               | TOSCA                         | Ear lobe                            | not reported       |
| Bernet-Buettiker 2005 (11) | 30  | NICU                                                                             | Median 42.3 mmHg, range 24.1-56.9           | TOSCA                         | Ear lobe                            | 42°C               |
| Bobbia 2015 (12)           | 90  | Acute respiratory failure in ED                                                  | Median 46.2 mmHg; IQR 37.6, 66.8            | TOSCA TCM4                    | Ear lobe                            | 44°C               |
| Bolliger 2007 (13)         | 112 | Adults undergoing major surgery then transferred to ICU                          | Not reported                                | Sentec and TOSCA500 Sensor 92 | Ear lobe                            | 42°C               |
| Carter 2001 (14)           | 46  | NICU after cardiac surgery                                                       | Range 23-52 mmHg                            | Fastrac                       | Upper abdomen, chest or upper thigh | 43°C               |
| Chakravarthy 2010 (15)     | 32  | Post cardiac surgery in ICU                                                      | Not reported                                | TCM4                          | Upper chest                         | 43°C               |

|                               |     |                                                                                       |                                               |                    |                                                           |              |
|-------------------------------|-----|---------------------------------------------------------------------------------------|-----------------------------------------------|--------------------|-----------------------------------------------------------|--------------|
| Chhajed 2010 (16)             | 270 | Respiratory laboratory                                                                | Median 4.7 kPa, IQR 0.8                       | Sentec V-Sign      | Ear lobe                                                  | 42°C         |
| Chhajed 2012 (17)             | 40  | Adult ICU                                                                             | Median 4.84 kPa, range 4.3-6.04               | Sentec V-Sign      | Ear lobe                                                  | 42°C         |
| Cox 2006 (18)                 | 15  | Thoracic surgery with one lung ventilation                                            | Not reported                                  | Sentec V-Sign      | Ear lobe                                                  | 42°C         |
| Cuvelier 2005 (19)            | 12  | Long-term home ventilation, mask or tracheotomy-mediated                              | Range 37-58                                   | TCM3               | Chest                                                     | 44°C         |
| Delorme 2012 (20)             | 48  | Acute respiratory failure in ED                                                       | 42 mmHg(16), range 18-108                     | TOSCA500 Sensor 92 | Ear lobe                                                  | 42°C         |
| DeOliveira Jr 2010 (21)       | 40  | Females undergoing gynaecological surgery with sedation (not mechanically ventilated) | Not reported                                  | TOSCA500 Sensor 92 | Ear lobe                                                  | 42°C         |
| Dion 2015 (22)                | 25  | Laparoscopic-assisted bariatric surgery in severely obese patients                    | Not reported                                  | Sentec Vsign2      | Palmar surface of the forearm or the infraclaviculararea. | 42°C         |
| Domingo 2006 (23)             | 130 | Patients referred for respiratory function tests                                      | 42.2 mmHg (7.2)                               | Sentec Vsign       | Ear lobe                                                  | 42°C         |
| Dullenkopf 2003 (24)          | 60  | Paediatric surgery                                                                    | 4.66 (0.48), range 3.8-7.3                    | TOSCA              | Ear lobe                                                  | 42°C         |
| Ekkerkamp 2015 (25)           | 100 | Patients with respiratory disease and healthy controls                                | 42 (6.9) mmHg                                 | TCM4               | Chest                                                     | 44°C         |
| Fanelli 2008 (26)             | 13  | Post-anaesthesia recovery                                                             | 39.2 mmHg (IQR - 37.6,40.7), range 26-52 mmHg | Sentec Vsign       | Not reported                                              | 42°C         |
| Fernández de Miguel 2010 (27) | 12  | PICU                                                                                  | 51 mmHg (13)                                  | Sentec             | Not reported                                              | not reported |
| Fuke 2009 (28)                | 9   | Healthy volunteers                                                                    | Not reported                                  | TOSCA              | Ear lobe                                                  | 42°C         |
| Gancel 2011 (29)              | 21  | Acute respiratory failure in ED                                                       | 51.6 mmHg (16.7), range 22.8-84.3 mmHg        | TOSCA500 Sensor 92 | Ear lobe                                                  | 42°C         |

|                          |    |                                              |                                                               |              |                                |              |
|--------------------------|----|----------------------------------------------|---------------------------------------------------------------|--------------|--------------------------------|--------------|
| Griffin 2003 (30)        | 30 | General anaesthesia in severely obese adults | Not reported                                                  | TCM3         | Forearm                        | 45°C         |
| Hazenberg 2011 (31)      | 15 | Chronic respiratory failure                  | Not reported                                                  | TOSCA        | Ear lobe                       | 42°C         |
| Henao-Brasseur 2016 (32) | 37 | Adult ICU                                    | Not reported                                                  | Sentec       | Not reported                   | not reported |
| Herrejon 2006 (33)       | 30 | Chronic respiratory failure                  | Median 42.6 mmHg, range 31.5-75.4 mmHg                        | Sentec Vsign | Ear lobe                       | 42°C         |
| Heuss 2004 (34)          | 33 | Adults undergoing colonoscopy                | Not reported                                                  | Sentec Vsign | Ear lobe                       | 42°C         |
| Hinkelbein 2008 (35)     | 34 | Adult ICU                                    | 43.2 mmHg (8.8), range 24.9-72.4 mmHg                         | TCM4         | Chest                          | 42°C         |
| Hirabayashi 2009 (36)    | 39 | Adult ICU and post-anaesthesia recovery      | range 30-45                                                   | TCM3         | Upper arm                      | 44°C         |
| Hirata 2014 (37)         | 48 | NICU                                         | Not reported                                                  | TCM4         | Abdomen, chest, back and thigh | 38-42°C      |
| Janssens 2005 (38)       | 40 | Chronic respiratory failure                  | 42 mmHg (11), range 20-71 mmHg                                | TCM3         | Chest                          | 43°C         |
| Janssens 2001 (39)       | 28 | Chronic respiratory failure                  | 49 mmHg (8.6), range 32-66 mmHg                               | TCM3         | Chest                          | 43°C         |
| Johnson 2008 (40)        | 38 | Adult ICU                                    | Not reported                                                  | Sentec Vsign | Ear lobe                       | 42°C         |
| Kelly 2011 (41)          | 46 | Acute respiratory failure in ED              | median 60 mmHg (IQR 46-70), range 33-91 mmHg                  | TCM4         | Chest                          | not reported |
| Kim 2014 (42)            | 53 | Acute respiratory failure in ED              | Normotensive: 55.5 mmHg (24.1); hypotensive: 44.5 mmHg (18.4) | Sentec Vsign | Ear lobe                       | 42°C         |

|                        |    |                                                                        |                                          |                 |                           |               |
|------------------------|----|------------------------------------------------------------------------|------------------------------------------|-----------------|---------------------------|---------------|
| Lermuzeaux 2016 (43)   | 25 | Acute respiratory failure in ED                                        | 44 mmHg (12.7)                           | Sentec Vsign    | Ear lobe                  | 42°C          |
| Liu 2014 (44)          | 21 | Anesthesia of obese patients undergoing laparoscopic bariatric surgery | Not reported                             | TCM4            | Chest                     | 44°C          |
| Maniscalco 2008 (45)   | 35 | Obese patients undergoing respiratory function tests                   | Not reported                             | TOSCA           | Ear lobe                  | 42°C          |
| McBride 2002 (46)      | 30 | neurosurgical procedures in adults                                     | range 26 to 62 mmHg                      | TOSCA           | Not reported              | 44°C          |
| McVicar 2009 (47)      | 51 | Acute respiratory failure in ED                                        | Median 5.5 kPa, range 2.27-9.43 kPa      | TOSCA           | Ear lobe                  | 42°C          |
| Mukhopadhyay 2016 (48) | 52 | NICU                                                                   | Not reported                             | Sentec          | Not reported              | not reported  |
| Nicolini 2011 (49)     | 80 | Acute respiratory failure in ED                                        | mean 56.97 mmHg (9.87), range 42-89 mmHg | TOSCA           | Ear lobe                  | not reported  |
| Nishiyama 2006 (50)    | 15 | Adults undergoing surgery with general anaesthesia                     | Not reported                             | TCM4            | Chest, upper arm, forearm | 43°C          |
| Nishiyama 2011 (51)    | 10 | Adults undergoing surgery with general anaesthesia                     | Not reported                             | TCM4 and Sentec | Chest, ear lobe           | 43°C and 42°C |
| Oshibuchi 2003 (52)    | 26 | Thoracic surgery with one lung ventilation                             | 41 mmHg (4)                              | TCM3            | Upper arm                 | 42°C          |
| Parker 2007 (53)       | 48 | Chronic respiratory failure                                            | range 4 - 10.9 kPa                       | TOSCA           | Ear lobe                  | 42°C          |
| Perrin 2011 (54)       | 24 | Acute respiratory failure in ED                                        | median 36.5 mmHg, range 19-64 mmHg       | TOSCA500        | Ear lobe                  | not reported  |
| Peschanski 2016 (55)   | 64 | Acute respiratory failure in ED                                        | 49 mmHg (16) range 22-103 mmHg           | TCM4            | Chest or forearm          | 44°C          |
| Piquilloud 2013 (56)   | 20 | Acute respiratory failure in ED                                        | range 43-80 mmHg                         | Sentec          | Ear lobe                  | not reported  |
| Rodriguez 2006 (57)    | 50 | Adult ICU                                                              | Not reported                             | Sentec          | Ear lobe                  | 42°C          |



|                           |    |                                                          |                                                             |                         |                            |              |
|---------------------------|----|----------------------------------------------------------|-------------------------------------------------------------|-------------------------|----------------------------|--------------|
| Roediger 2011 (58)        | 20 | Adult ICU                                                | median 36.7 mmHg, range 27.3-54.7                           | Sentec Vsign            | Ear lobe, forehead, cheek  | 42°C         |
| Rosier 2014 (59)          | 25 | Adult ICU                                                | 37 mmHg (6.2)                                               | Sentec Vsign            | Ear lobe                   | 42°C         |
| Ruiz 2016 (60)            | 81 | Acute respiratory failure in ED                          | 59.8 mmHg (11.9)                                            | Sentec Vsign            | Chest                      | 42°C         |
| Sandberg 2011 (61)        | 46 | NICU                                                     | 6.9 mmHg (95% CI=6.7-7.8)                                   | TOSCA                   | Chest                      | 43°C         |
| Schafroth Török 2008 (62) | 19 | Chronic respiratory failure                              | 47.8 mmHg (9)                                               | Sentec                  | Ear lobe                   | 42°C         |
| Senn 2005 (63)            | 18 | Adult ICU                                                | range 22-59 mmHg                                            | TOSCA                   | Ear lobe                   | 42°C         |
| Simon 2003 (64)           | 15 | Rigid bronchoscopy during high-frequency jet ventilation | Not reported                                                | Microgas                | Abdomen                    | 42°C         |
| Stege 2009 (65)           | 12 | Cardiopulmonary exercise testing                         | range 3.28 -7.75 kPa                                        | TOSCA500 Sensor 92      | Ear lobe                   | 42°C         |
| Storre 2007 (66)          | 10 | Initiation of noninvasive ventilation                    | Baseline 67.2 mmHg (11.9)                                   | Sentec Vsign            | Ear lobe                   | 42°C         |
| Tingay 2005 (67)          | 21 | NICU                                                     | Not reported                                                | Microgas                | Chest or abdomen           | not reported |
| Tobias 2003 (68)          | 15 | Thoracic surgery with one lung ventilation               | Not reported                                                | TCM3                    | Not reported               | 45°C         |
| Tonelli 2015 (69)         | 29 | Chronic respiratory failure                              | 33 mmHg (5)                                                 | PeriFlux                | Forearm                    | 45°C         |
| Tschupp 2003 (70)         | 20 | PICU                                                     | range 30-46.5 mmHg                                          | Sentec Vsign            | Ear lobe                   | 42°C         |
| Urbano 2010 (71)          | 41 | PICU                                                     | Median 44 mHg, range 28-85                                  | Sentec, TOSCA 500, TCM3 | Chest, abdomen or ear lobe | 42°C, 43.5°C |
| vanOppen 2015 (72)        | 10 | Adult ICU                                                | Admission 75.53 mmHg                                        | TCM4                    | Ear lobe                   | not reported |
| Vivien 2006 (73)          | 20 | Apnea testing in brain-dead patients                     | Baseline 41.4 mmHg (6.3); end of apnoea test 98.3 mmHg (20) | Sentec Vsign            | Ear lobe                   | 42°C         |
| Xue 2010 (74)             | 16 | Adults undergoing prolonged laporoscopic surgery         | Baseline 40 mmHg (3.6), 30 minutes 47                       | Sentec Vsign            | Ear lobe                   | 42°C         |

|                 |    |                                               |                                                                                                                                                                |      |           |      |
|-----------------|----|-----------------------------------------------|----------------------------------------------------------------------------------------------------------------------------------------------------------------|------|-----------|------|
|                 |    |                                               | mmHg (3.5), 60<br>minutes 44.9<br>mmHg (5.2)                                                                                                                   |      |           |      |
| Zhang 2015 (75) | 18 | Thoracic surgery with one lung<br>ventilation | Baseline TLV<br>46.5 mmHg<br>(6.9), 30<br>minutes OLV<br>52.2 mmHg<br>(9.1), OLV60<br>52.2 mmHg (7),<br>OLV90 52.4<br>mmHg (6.9),<br>OLV120 52.2<br>mmHg (6.6) | TCM3 | Upper arm | 42°C |

Legend: ICU=Intensive care unit; NICU=Neonatal intensive care unit; PICU=Pediatric intensive care unit; ED=Emergency department

## References for supplementary information

1. Tipton E, Shuster J. A framework for the meta-analysis of Bland–Altman studies based on a limits of agreement approach. *Statistics in Medicine*. 2017;36(23):3621-35.
2. DerSimonian R, Laird N. Meta-analysis in clinical trials. *Controlled Clinical Trials*. 1986;7(3):177-88.
3. Aarrestad S, Tollefsen E, Kleiven AL, Qvarfort M, Janssens J-P, Skjønberg OH. Validity of transcutaneous PCO<sub>2</sub> in monitoring chronic hypoventilation treated with non-invasive ventilation. *Respiratory Medicine*. 2016;112:112-8.
4. Baulig W, Schütt P, Roth HR, Hayoz J, Schmid ER. Clinical validation of a digital transcutaneous PCO<sub>2</sub>/SpO<sub>2</sub> ear sensor in adult patients after cardiac surgery. *Journal Of Clinical Monitoring And Computing*. 2007;21(5):303-9.
5. Baulig W, Keselj M, Baulig B, Guzzella S, Borgeat A, Aguirre J. Transcutaneous continuous carbon dioxide tension monitoring reduced incidence, degree and duration of hypercapnia during combined regional anaesthesia and monitored anaesthesia care in shoulder surgery patients. *Journal of Clinical Monitoring and Computing*. 2015;29(4):499-507.
6. Bendjelid K, Schütz N, Stotz M, Gerard I, Suter PM, Romand J-A. Transcutaneous PCO<sub>2</sub> monitoring in critically ill adults: clinical evaluation of a new sensor. *Critical Care Medicine*. 2005;33(10):2203-6.
7. Berkenbosch JW, Lam J, Burd RS, Tobias JD. Noninvasive monitoring of carbon dioxide during mechanical ventilation in older children: end-tidal versus transcutaneous techniques. *Anesthesia And Analgesia*. 2001;92(6):1427-31.
8. Berkenbosch JW, Tobias JD. Transcutaneous carbon dioxide monitoring during high-frequency oscillatory ventilation in infants and children. *Critical Care Medicine*. 2002;30(5):1024-7.
9. Berlowitz DJ, Spong J, O'Donoghue FJ, Pierce RJ, Brown DJ, Campbell DA, et al. Transcutaneous measurement of carbon dioxide tension during extended monitoring: evaluation of accuracy and stability, and an algorithm for correcting calibration drift. *Respiratory Care*. 2011;56(4):442-8.
10. Bernet V, Döll C, Cannizzaro V, Ersch J, Frey B, Weiss M. Longtime performance and reliability of two different PtcCO<sub>2</sub> and SpO<sub>2</sub> sensors in neonates. *Paediatric Anaesthesia*. 2008;18(9):872-7.
11. Bernet-Buettiker V, Ugarte MJ, Frey B, Hug MI, Baenziger O, Weiss M. Evaluation of a new combined transcutaneous measurement of PCO<sub>2</sub>/pulse oximetry oxygen saturation ear sensor in newborn patients. *Pediatrics*. 2005;115(1):e64-e8.
12. Bobbia X, Claret P-G, Palmier L, Robert M, Granpierre RG, Roger C, et al. Erratum: Concordance and limits between transcutaneous and arterial carbon dioxide pressure in emergency department patients with acute respiratory failure: a single-center, prospective, and observational study. *Scandinavian Journal of Trauma, Resuscitation and Emergency Medicine*. 2015;23(1):77.
13. Bolliger D, Steiner LA, Kasper J, Aziz OA, Filipovic M, Seeberger MD. The accuracy of non-invasive carbon dioxide monitoring: a clinical evaluation of two transcutaneous systems. *Anaesthesia*. 2007;62(4):394-9.
14. Carter BG, Wiwczaruk D, Hochmann M, Osborne A, Henning R. Performance of transcutaneous PCO<sub>2</sub> and pulse oximetry monitors in newborns and infants after cardiac surgery. *Anaesthesia And Intensive Care*. 2001;29(3):260-5.
15. Chakravarthy M, Narayan S, Govindarajan R, Jawali V, Rajeev S. Weaning mechanical ventilation after off-pump coronary artery bypass graft procedures directed by noninvasive gas measurements. *Journal Of Cardiothoracic And Vascular Anesthesia*. 2010;24(3):451-5.
16. Chhajed PN, Miedinger D, Baty F, Bernasconi M, Heuss LT, Leuppi JD, et al. Comparison of combined oximetry and cutaneous capnography using a digital sensor with arterial blood gas analysis. *Scandinavian Journal Of Clinical And Laboratory Investigation*. 2010;70(1):60-4.

17. Chhajed PN, Chaudhari P, Tulasigeri C, Kate A, Kesarwani R, Miedinger D, et al. Infraclavicular sensor site: a new promising site for transcutaneous capnography. *Scandinavian Journal Of Clinical And Laboratory Investigation*. 2012;72(4):340-2.
18. Cox P, Tobias JD. Noninvasive monitoring of PaCO<sub>2</sub> during one-lung ventilation and minimal access surgery in adults: End-tidal versus transcutaneous techniques. *Journal of Minimal Access Surgery*. 2006;3(1):8-13.
19. Cuvelier A, Grigoriu B, Molano LC, Muir J-F. Limitations of transcutaneous carbon dioxide measurements for assessing long-term mechanical ventilation. *Chest*. 2005;127(5):1744-8.
20. Delerme S, Montout V, Goulet H, Arhan A, Le Saché F, Devilliers C, et al. Concordance between transcutaneous and arterial measurements of carbon dioxide in an ED. *American Journal of Emergency Medicine*. 2012;30(9):1872-6.
21. De Oliveira Jr GS, Ahmad S, Fitzgerald PC, McCarthy RJ. Detection of hypoventilation during deep sedation in patients undergoing ambulatory gynaecological hysteroscopy: A comparison between transcutaneous and nasal end-tidal carbon dioxide measurements. *British Journal of Anaesthesia*. 2010;104(6):774-8.
22. Dion JM, McKee C, Tobias JD, Herz D, Sohner P, Teich S, et al. Carbon dioxide monitoring during laparoscopic-assisted bariatric surgery in severely obese patients: transcutaneous versus end-tidal techniques. *Journal Of Clinical Monitoring And Computing*. 2015;29(1):183-6.
23. Domingo C, Canturri E, Luján M, Moreno A, Espuelas H, Marín A. Transcutaneous measurement of partial pressure of carbon dioxide and oxygen saturation: Validation of the SenTec monitor. *Archivos de Bronconeumologia*. 2006;42(5):246-51.
24. Dullenkopf A, Bernardo SD, Berger F, Fasnacht M, Gerber AC, Weiss M. Evaluation of a new combined SpO<sub>2</sub>/PtcCO<sub>2</sub> sensor in anaesthetized paediatric patients. *Paediatric Anaesthesia*. 2003;13(9):777-84.
25. Ekkernkamp E, Welte L, Schmoor C, Huttmann SE, Dreher M, Windisch W, et al. Spot check analysis of gas exchange: invasive versus noninvasive methods. *Respiration*. 2015;89(4):294-303.
26. Fanelli G, Baciarello M, Squicciarini G, Malagutti G, Zasa M, Casati A. Transcutaneous carbon dioxide monitoring in spontaneously breathing, nonintubated patients in the early postoperative period. *Minerva Anestesiologica*. 2008;74(7-8):375-80.
27. Fernández de Miguel S, Gaboli M, González-Celador R, Gómez de Quero P, Murga Herrero V, Sánchez Granados JM, et al. Validation of the transcutaneous carbon dioxide tension measurements in critical paediatric patients. *Anales de Pediatría*. 2010;72(3):165-71.
28. Fuke S, Miyamoto K, Ohira H, Ohira M, Odajima N, Nishimura M. Evaluation of transcutaneous CO<sub>2</sub> responses following acute changes in PaCO<sub>2</sub> in healthy subjects. *Respirology (Carlton, Vic.)*. 2009;14(3):436-42.
29. Gancel PE, Roupie E, Guittet L, Laplume S, Terzi N. Accuracy of a transcutaneous carbon dioxide pressure monitoring device in emergency room patients with acute respiratory failure. *Intensive Care Medicine*. 2011;37(2):348-51.
30. Griffin J, Terry BE, Burton RK, Ray TL, Landrum AL, Johnson JO, et al. Comparison of end-tidal and transcutaneous measures of carbon dioxide during general anaesthesia in severely obese adults. *British Journal of Anaesthesia*. 2003;91(4):498-501.
31. Hazenberg A, Zijlstra JG, Kerstjens HAM, Wijkstra PJ. Validation of a transcutaneous CO<sub>2</sub> monitor in adult patients with chronic respiratory failure. *Respiration*. 2011;81(3):242-6.
32. Henao-Brasseur J, Bedel J, Mutlu G, Grimaldi D, Brasseur F, Laurent V, et al. Transcutaneous CO<sub>2</sub> monitoring: a new tool to identify spontaneous breathing trial failure during weaning from mechanical ventilation. A pilot cohort study. *Intensive Care Medicine*. 2016;42(6):1078-9.

33. Herrejón A, Inchaurreaga I, Palop J, Ponce S, Peris R, Terrádez M, et al. Usefulness of transcutaneous carbon dioxide pressure monitoring to measure blood gases in adults hospitalized for respiratory disease. *Archivos De Bronconeumología*. 2006;42(5):225-9.
34. Heuss LT, Chhajed PN, Schnieper P, Hirt T, Beglinger C. Combined pulse oximetry/cutaneous carbon dioxide tension monitoring during colonoscopies: pilot study with a smart ear clip. *Digestion*. 2004;70(3):152-8.
35. Hinkelbein J, Floss F, Denz C, Krieter H. Accuracy and precision of three different methods to determine Pco<sub>2</sub> (Paco<sub>2</sub> vs. Petco<sub>2</sub> vs. Ptcco<sub>2</sub>) during interhospital ground transport of critically ill and ventilated adults. *Journal of Trauma - Injury, Infection and Critical Care*. 2008;65(1):10-8.
36. Hirabayashi M, Fujiwara C, Ohtani N, Kagawa S, Kamide M. Transcutaneous PCO<sub>2</sub> monitors are more accurate than end-tidal PCO<sub>2</sub> monitors. *Journal Of Anesthesia*. 2009;23(2):198-202.
37. Hirata K, Nishihara M, Oshima Y, Hirano S, Kitajima H. Application of transcutaneous carbon dioxide tension monitoring with low electrode temperatures in premature infants in the early postnatal period. *American Journal Of Perinatology*. 2014;31(5):435-40.
38. Janssens JP, Laszlo A, Uldry C, Titelion V, Picaud C, Michel JP. Non-invasive (transcutaneous) monitoring of PCO<sub>2</sub> (TcPCO<sub>2</sub>) in older adults. *Gerontology*. 2005;51(3):174-8.
39. Janssens JP, Perrin E, Bennani I, De Muralt B, Titelion V, Picaud C. Is continuous transcutaneous monitoring of PCO<sub>2</sub> (TcPCO<sub>2</sub>) over 8 h reliable in adults? *Respiratory Medicine*. 2001;95(5):331-5.
40. Johnson DC, Batool S, Dalbec R. Transcutaneous carbon dioxide pressure monitoring in a specialized weaning unit. *Respiratory Care*. 2008;53(8):1042-7.
41. Kelly AM, Klim S. Agreement between arterial and transcutaneous pCO<sub>2</sub> measurement in patients undergoing non-invasive ventilation: A pilot study. *EMA - Emergency Medicine Australasia*. 2011;23:33.
42. Kim J-Y, Yoon Y-H, Lee S-W, Choi S-H, Cho Y-D, Park S-M. Accuracy of transcutaneous carbon dioxide monitoring in hypotensive patients. *Emergency Medicine Journal: EMJ*. 2014;31(4):323-6.
43. Lermuzeaux M, Meric H, Sauneuf B, Girard S, Normand H, Lofaso F, et al. Superiority of transcutaneous CO<sub>2</sub> over end-tidal CO<sub>2</sub> measurement for monitoring respiratory failure in nonintubated patients: A pilot study. *Journal Of Critical Care*. 2016;31(1):150-6.
44. Liu S, Sun J, Chen X, Yu Y, Liu X, Liu C. The application of transcutaneous CO<sub>2</sub> pressure monitoring in the anesthesia of obese patients undergoing laparoscopic bariatric surgery. *Plos One*. 2014;9(4):e91563-e.
45. Maniscalco M, Zedda A, Faraone S, Carratù P, Sofia M. Evaluation of a transcutaneous carbon dioxide monitor in severe obesity. *Intensive Care Medicine*. 2008;34(7):1340-4.
46. McBride DS, Jr., Johnson JO, Tobias JD. Noninvasive carbon dioxide monitoring during neurosurgical procedures in adults: end-tidal versus transcutaneous techniques. *Southern Medical Journal*. 2002;95(8):870-4.
47. McVicar J, Eager R. Validation study of a transcutaneous carbon dioxide monitor in patients in the emergency department. *Emergency Medicine Journal: EMJ*. 2009;26(5):344-6.
48. Mukhopadhyay S, Maurer R, Puopolo KM. Neonatal Transcutaneous Carbon Dioxide Monitoring--Effect on Clinical Management and Outcomes. *Respiratory Care*. 2016;61(1):90-7.
49. Nicolini A, Ferrari MB. Evaluation of a transcutaneous carbon dioxide monitor in patients with acute respiratory failure. *Annals of Thoracic Medicine*. 2011;6(4):217-20.
50. Nishiyama T, Nakamura S, Yamashita K. Comparison of the transcutaneous oxygen and carbon dioxide tension in different electrode locations during general anaesthesia. *European Journal Of Anaesthesiology*. 2006;23(12):1049-54.

51. Nishiyama T, Kohno Y, Koishi K. Comparison of ear and chest probes in transcutaneous carbon dioxide pressure measurements during general anesthesia in adults. *Journal Of Clinical Monitoring And Computing*. 2011;25(5):323-8.
52. Oshibuchi M, Cho S, Hara T, Tomiyasu S, Makita T, Sumikawa K. A comparative evaluation of transcutaneous and end-tidal measurements of CO<sub>2</sub> in thoracic anesthesia. *Anesthesia And Analgesia*. 2003;97(3):776-9.
53. Parker SM, Gibson GJ. Evaluation of a transcutaneous carbon dioxide monitor ("TOSCA") in adult patients in routine respiratory practice. *Respiratory Medicine*. 2007;101(2):261-4.
54. Perrin K, Wijesinghe M, Healy B, Wadsworth K, Bowditch R, Bibby S, et al. Randomised controlled trial of high concentration versus titrated oxygen therapy in severe exacerbations of asthma. *Thorax*. 2011:thx. 2010.155259.
55. Peschanski N, Garcia L, Delasalle E, Mzabi L, Rouff E, Dautheville S, et al. Can transcutaneous carbon dioxide pressure be a surrogate of blood gas samples for spontaneously breathing emergency patients? The ERNESTO experience. *Emerg Med J*. 2016;33(5):325-8.
56. Piquilloud L, Jolliet P, Revelly J. Thévoz, D., & P. . Relationship between transcutaneous CO<sub>2</sub> measurement and PaCO<sub>2</sub> during non invasive ventilation delivered in hypercapnic acute respiratory failure. *Schweiz Med Forum* 61. 2013;2013 SRC - GoogleScholar.
57. Rodriguez P, Lellouche F, Aboab J, Buisson CB, Brochard L. Transcutaneous arterial carbon dioxide pressure monitoring in critically ill adult patients. *Intensive Care Medicine*. 2006;32(2):309-12.
58. Roediger R, Beck-Schimmer B, Theusinger OM, Rusch D, Seifert B, Spahn DR, et al. The revised digital transcutaneous PCO<sub>2</sub>/SpO<sub>2</sub> ear sensor is a reliable noninvasive monitoring tool in patients after cardiac surgery. *Journal Of Cardiothoracic And Vascular Anesthesia*. 2011;25(2):243-9.
59. Rosier S, Launey Y, Bleichner JP, Laviolle B, Jouve A, Malledant Y, et al. The accuracy of transcutaneous P<sub>CO<sub>2</sub></sub> in subjects with severe brain injury: A comparison with End-Tidal P<sub>CO<sub>2</sub></sub>. *Respiratory Care*. 2014;59(8):1242-7.
60. Ruiz Y, Farrero E, Córdoba A, González N, Dorca J, Prats E. Transcutaneous carbon dioxide monitoring in subjects with acute respiratory failure and severe hypercapnia. *Respiratory Care*. 2016;61(4):428-33.
61. Sandberg KL, Brynjarsson H, Hjalmarson O. Transcutaneous blood gas monitoring during neonatal intensive care. *Acta Paediatrica (Oslo, Norway: 1992)*. 2011;100(5):676-9.
62. Schafroth Török S, Leuppi JD, Baty F, Tamm M, Chhajed PN. Combined oximetry-cutaneous capnography in patients assessed for long-term oxygen therapy. *Chest*. 2008;133(6):1421-5.
63. Senn O, Clarenbach CF, Kaplan V, Maggiorini M, Bloch KE. Monitoring carbon dioxide tension and arterial oxygen saturation by a single earlobe sensor in patients with critical illness or sleep apnea. *Chest*. 2005;128(3):1291-6.
64. Simon M, Gottschall R, Gugel M, Fritz H, Mohr S, Klein U. Comparison of transcutaneous and endtidal CO<sub>2</sub>-monitoring for rigid bronchoscopy during high-frequency jet ventilation. *Acta Anaesthesiologica Scandinavica*. 2003;47(7):861-7.
65. Stege G, van den Elshout FJJ, Heijdra YF, van de Ven MJT, Dekhuijzen PNR, Vos PJE. Accuracy of transcutaneous carbon dioxide tension measurements during cardiopulmonary exercise testing. *Respiration; International Review Of Thoracic Diseases*. 2009;78(2):147-53.
66. Storre JH, Steurer B, Kabitz H-J, Dreher M, Windisch W. Transcutaneous PCO<sub>2</sub> monitoring during initiation of noninvasive ventilation. *Chest*. 2007;132(6):1810-6.
67. Tingay DG, Stewart MJ, Morley CJ. Monitoring of end tidal carbon dioxide and transcutaneous carbon dioxide during neonatal transport. *Archives of Disease in Childhood: Fetal and Neonatal Edition*. 2005;90(6):F523-F6.
68. Tobias JD. Noninvasive carbon dioxide monitoring during one-lung ventilation: End-tidal versus transcutaneous techniques. *Journal Of Cardiothoracic And Vascular Anesthesia*. 2003;17(3):306-8.

69. Tonelli AR, Alkukhun L, Cikach F, Ahmed M, Dweik RA. Are Transcutaneous Oxygen and Carbon Dioxide Determinations of Value in Pulmonary Arterial Hypertension? *Microcirculation*. 2015;22(4):249-56.
70. Tschupp A, Fanconi S. A combined ear sensor for pulse oximetry and carbon dioxide tension monitoring: Accuracy in critically ill children. *Anesthesia And Analgesia*. 2003;96(1):82-4.
71. Urbano J, Cruzado V, López-Herce J, del Castillo J, Bellón JM, Carrillo A. Accuracy of three transcutaneous carbon dioxide monitors in critically ill children. *Pediatric Pulmonology*. 2010;45(5):481-6.
72. van Oppen JD, Daniel PS, Sovani MP. What is the potential role of transcutaneous carbon dioxide in guiding acute noninvasive ventilation? *Respiratory Care*. 2015;60(4):484-91.
73. Vivien B, Marmion F, Roche S, Devilliers C, Langeron O, Coriat P, et al. An evaluation of transcutaneous carbon dioxide partial pressure monitoring during apnea testing in brain-dead patients. *Anesthesiology*. 2006;104(4):701-7.
74. Xue Q, Wu X, Jin J, Yu B, Zheng M. Transcutaneous carbon dioxide monitoring accurately predicts arterial carbon dioxide partial pressure in patients undergoing prolonged laparoscopic surgery. *Anesthesia And Analgesia*. 2010;111(2):417-20.
75. Zhang H, Wang D-X. Noninvasive Measurement of Carbon Dioxide during One-Lung Ventilation with Low Tidal Volume for Two Hours: End-Tidal versus Transcutaneous Techniques. *Plos One*. 2015;10(10):e0138912-e.
